# Supplementary material
Source: PubMed Central journal article supplement (PMC5437844)
Supplement: NIHMS857247-supplement-SI.pdf [file NIHMS857247-supplement-SI.pdf]

## Phenylthiazole Antibacterial Agents Targeting Cell Wall Synthesis Exhibit Potent Activity *In Vitro* and *In Vivo* against Vancomycin-resistant Enterococci

Haroon Mohammad, Waleed Younis, Lu Chen, Christine E. Peters, Joe Pogliano, Kit Pogliano, Bruce Cooper, Jianan Zhang, Abdelrahman Mayhoub, Eric Oldfield, Mark Cushman, and Mohamed N. Seleem

### Table of Contents

|                                                                                                                                                                                                                                                                                                                                                            |     |
|------------------------------------------------------------------------------------------------------------------------------------------------------------------------------------------------------------------------------------------------------------------------------------------------------------------------------------------------------------|-----|
| <b>Table S1:</b> Strains of <i>E. faecium</i> and <i>E. faecalis</i> utilized in this study.....                                                                                                                                                                                                                                                           | S2  |
| <b>Table S2:</b> Minimum inhibitory concentration (MIC) and minimum bactericidal concentration (MBC) of phenylthiazole compounds <b>1-3</b> , ampicillin, ciprofloxacin, doxycycline, vancomycin, and linezolid against six vancomycin-sensitive (VSE) and eight vancomycin-resistant <i>Enterococcus faecalis</i> or <i>E. faecium</i> (VRE) strains..... | S4  |
| <b>Table S3:</b> Fractional inhibitory concentration (FIC) index of phenylthiazole compounds <b>1-3</b> tested in combination with ciprofloxacin against enterococci via the checkerboard assay. ....                                                                                                                                                      | S8  |
| <b>Figure S1.</b> Profiles of membrane and cell wall active compounds in <i>B. subtilis</i> grown in LB at 37 °C. ....                                                                                                                                                                                                                                     | S9  |
| <b>Figure S2.</b> Profiles of membrane and cell wall active compounds in <i>B. subtilis</i> grown in LB in the presence of MSM at 37 °C.....                                                                                                                                                                                                               | S10 |
| <b>Figure S3.</b> Percent Sytox permeable <i>B. subtilis</i> cells.....                                                                                                                                                                                                                                                                                    | S11 |
| <b>Figure S4.</b> Detection of final soluble cell wall precursor (UDP- <i>N</i> -acetylmuramyl pentapeptide) inside bacterial cytoplasm.....                                                                                                                                                                                                               | S12 |

**Table S1:** Strains of *E. faecium* and *E. faecalis* utilized in this study.

| <b>Strain ID</b>                                       | <b>Alternate Strain ID</b> | <b>Isolated From</b>        | <b>Year</b> | <b>Source</b>                               | <b>Antimicrobial Resistance Phenotype</b>  |
|--------------------------------------------------------|----------------------------|-----------------------------|-------------|---------------------------------------------|--------------------------------------------|
| <i>E. faecalis</i><br>ATCC 49532                       | UWH 1921                   | Wisconsin, USA <sup>1</sup> | -           | Blood                                       | Gentamicin                                 |
| <i>E. faecalis</i><br>ATCC 49533                       | UWH 1936                   | Wisconsin, USA              | -           | Blood                                       | Streptomycin                               |
| <i>E. faecalis</i><br>NR-31887                         | B3336                      | -                           | 1987        | Blood                                       | Gentamicin                                 |
| <i>E. faecalis</i><br>NR-31975                         | MMH594                     | Wisconsin, USA              | 1985        | Blood                                       | Erythromycin and gentamicin                |
| <i>E. faecalis</i><br>ATCC 29212                       | -                          | -                           | -           | Urine                                       | -                                          |
| <i>E. faecalis</i><br>ATCC 51299<br>(VRE) <sup>2</sup> | NJ-3                       | Missouri, USA               | -           | Peritoneal fluid                            | Vancomycin                                 |
| <i>E. faecalis</i><br>HM-201<br>(VRE)                  | TX0104                     | Connecticut, USA            | 2002        | Blood of endocarditis patient               | Ciprofloxacin and vancomycin               |
| <i>E. faecalis</i><br>HM-934<br>(VRE)                  | ERV103                     | Bogota, Columbia            | 2006        | Human secretion                             | Ciprofloxacin and vancomycin               |
| <i>E. faecalis</i><br>NR-31972<br>(VRE)                | SF28073                    | Michigan, USA               | 2003        | Urine                                       | Erythromycin, gentamicin, and vancomycin   |
| <i>E. faecalis</i><br>HM-334<br>(VRE)                  | S613                       | -                           | 2004        | Blood                                       | Vancomycin                                 |
| <i>E. faecalis</i><br>HM-335<br>(VRE)                  | R712                       | -                           | 2004        | Blood                                       | Vancomycin                                 |
| <i>E. faecium</i><br>HM-204                            | TX1330                     | Texas, USA                  | 1994        | Feces                                       |                                            |
| <i>E. faecium</i><br>HM-463                            | TX0133a04                  | Texas, USA                  | 2006        | Blood of diabetic patient with endocarditis | Ampicillin and ciprofloxacin               |
| <i>E. faecium</i><br>HM-959                            | 513                        | -                           | -           | -                                           | Ampicillin, ciprofloxacin, and doxycycline |

Table S1 continued

|                                              |              |                     |      |               |                               |
|----------------------------------------------|--------------|---------------------|------|---------------|-------------------------------|
| <i>E. faecium</i><br>NR-28979<br>(VRE)       | E1162        | France              | 1997 | Blood         | Ampicillin and<br>vancomycin  |
| <i>E. faecium</i><br>ATCC<br>700221<br>(VRE) | -            | Connecticut,<br>USA | -    | Feces         | Teicoplanin and<br>vancomycin |
| <i>E. faecium</i><br>HM-968<br>(VRE)         | ERV102       | Colombia            | 2006 | Oral sputum   | Vancomycin                    |
| <i>E. faecium</i><br>NR-31914<br>(VRE)       | E0120        | Netherlands         | 1995 | Ascites fluid | Vancomycin                    |
| <i>E. faecium</i><br>NR-31912<br>(VRE)       | Patient #3-1 | -                   | -    | Stool         | Vancomycin                    |
| <i>E. faecium</i><br>NR-31909<br>(VRE)       | Patient #2-1 | -                   | -    | Stool         | Vancomycin                    |
| <i>E. faecium</i><br>NR-31903<br>(VRE)       | Patient #1-1 | -                   | -    | Stool         | Linezolid and<br>vancomycin   |
| <i>E. faecium</i><br>NR-31915<br>(VRE)       | E0164        | Netherlands         | 1996 | Turkey feces  | Gentamicin and<br>vancomycin  |
| <i>E. faecium</i><br>E1071<br>(VRE)          | -            | Netherlands         | 2000 | -             | Vancomycin                    |
| <i>E. faecium</i><br>NR-31916<br>(VRE)       | E0269        | Netherlands         | 1996 | Turkey feces  | Gentamicin and<br>vancomycin  |

<sup>1</sup>USA = United States of America

<sup>2</sup>VRE = vancomycin-resistant enterococci

**Table S2:** Minimum inhibitory concentration (MIC) and minimum bactericidal concentration (MBC) of phenylthiazole compounds **1-3**, ampicillin, ciprofloxacin, doxycycline, vancomycin, and linezolid against six vancomycin-sensitive (VSE) and eight vancomycin-resistant *Enterococcus faecalis* or *E. faecium* (VRE) strains.

| Strain                              | <b>1</b> |     | <b>2</b> |     | <b>3</b> |     | <b>Ampicillin</b> |     | <b>Ciprofloxacin</b> |     | <b>Doxycycline</b> |     | <b>Vancomycin</b> |     | <b>Linezolid</b> |     |
|-------------------------------------|----------|-----|----------|-----|----------|-----|-------------------|-----|----------------------|-----|--------------------|-----|-------------------|-----|------------------|-----|
|                                     | MIC      | MBC | MIC      | MBC | MIC      | MBC | MIC               | MBC | MIC                  | MBC | MIC                | MBC | MIC               | MBC | MIC              | MBC |
| <i>E. faecalis</i><br>ATCC<br>49532 | 1        | 4   | 2        | 4   | 2        | 4   | 0.5               | 1   | 1                    | 1   | 0.5                | 32  | 1                 | -   | 1                | 64  |
| <i>E. faecalis</i><br>ATCC<br>49533 | 8        | 8   | 8        | 16  | 8        | 16  | 0.5               | 0.5 | 1                    | 1   | >64                | >64 | 1                 | 32  | 1                | 64  |
| <i>E. faecalis</i><br>NR-<br>31887  | 8        | 8   | 16       | 16  | 8        | 8   | 0.5               | 0.5 | 0.5                  | 0.5 | 32                 | >64 | 1                 | 8   | 1                | 16  |
| <i>E. faecalis</i><br>NR-<br>31975  | 4        | 4   | 2        | 2   | 2        | 4   | -                 | -   | -                    | -   | -                  | -   | 1                 | 64  | 1                | 128 |
| <i>E. faecalis</i><br>ATCC<br>29212 | 4        | -   | 16       | -   | 8        | -   | -                 | -   | -                    | -   | -                  | -   | 4                 | -   | 4                | -   |

Table S2 continued

|                                              |   |   |    |    |   |   |     |     |     |     |   |    |      |                 |   |     |
|----------------------------------------------|---|---|----|----|---|---|-----|-----|-----|-----|---|----|------|-----------------|---|-----|
| <i>E. faecalis</i><br>ATCC<br>51299<br>(VRE) | 2 | 2 | 2  | 4  | 2 | 4 | -   | -   | -   | -   | - | -  | 16   | -               | 1 | 128 |
| <i>E. faecalis</i><br>HM-201<br>(VRE)        | 8 | 8 | 16 | 16 | 4 | 4 | 0.5 | 0.5 | 64  | >64 | 1 | 32 | 64   | 64              | 1 | 16  |
| <i>E. faecalis</i><br>HM-934<br>(VRE)        | 8 | 8 | 16 | 16 | 8 | 8 | 1   | 1   | >64 | >64 | 1 | 64 | >64  | >64             | 1 | 64  |
| <i>E. faecalis</i><br>NR-<br>31972<br>(VRE)  | 2 | 4 | 2  | 16 | 4 | 4 | -   | -   | -   | -   | - | -  | >128 | ND <sup>1</sup> | 1 | 64  |
| <i>E. faecalis</i><br>HM-334<br>(VRE)        | 4 | 4 | 2  | 2  | 2 | 2 | -   | -   | -   | -   | - | -  | >64  | >64             | 1 | 32  |
| <i>E. faecalis</i><br>HM-335<br>(VRE)        | 2 | 2 | 1  | 1  | 1 | 1 | -   | -   | -   | -   | - | -  | >64  | >64             | 1 | 32  |

Table S2 continued

|                                              |     |    |     |    |     |     |     |     |     |     |     |     |      |     |     |      |
|----------------------------------------------|-----|----|-----|----|-----|-----|-----|-----|-----|-----|-----|-----|------|-----|-----|------|
| <i>E. faecium</i><br>HM-204                  | 4   | 16 | 8   | 32 | 4   | 8   | 1   | 1   | 1   | 1   | 1   | 32  | 1    | 16  | 2   | 32   |
| <i>E. faecium</i><br>HM-463                  | 4   | 4  | 8   | 16 | 4   | 4   | 16  | 32  | >64 | >64 | 0.5 | 16  | 0.5  | 0.5 | 0.5 | 8    |
| <i>E. faecium</i><br>HM-959                  | 4   | 4  | 8   | 8  | 4   | 4   | >64 | >64 | >64 | >64 | >64 | >64 | 1    | 16  | 2   | 16   |
| <i>E. faecium</i><br>NR-28979<br>(VRE)       | 2   | 4  | 1   | 16 | 1   | 4   | 0.5 | 0.5 | 2   | 2   | 32  | >64 | >64  | >64 | 1   | 16   |
| <i>E. faecium</i><br>ATCC<br>700221<br>(VRE) | 0.5 | 2  | 0.5 | 2  | 0.5 | 0.5 | -   | -   | -   | -   | -   | -   | >64  | ND  | 0.5 | >128 |
| <i>E. faecium</i><br>HM-968<br>(VRE)         | 2   | 4  | 1   | 16 | 1   | 4   | -   | -   | -   | -   | -   | -   | >64  | ND  | 0.5 | 128  |
| <i>E. faecium</i><br>NR-31914<br>(VRE)       | 2   | 4  | 1   | 32 | 2   | 4   | -   | -   | -   | -   | -   | -   | >128 | ND  | 1   | >128 |

Table S2 continued

|                                        |   |   |   |    |   |   |   |   |   |   |   |   |     |     |    |     |
|----------------------------------------|---|---|---|----|---|---|---|---|---|---|---|---|-----|-----|----|-----|
| <i>E. faecium</i><br>NR-31912<br>(VRE) | 2 | 4 | 2 | 16 | 2 | 4 | - | - | - | - | - | - | >64 | >64 | 2  | 32  |
| <i>E. faecium</i><br>NR-31909<br>(VRE) | 2 | 2 | 1 | 1  | 1 | 1 | - | - | - | - | - | - | 64  | -   | 1  | 8   |
| <i>E. faecium</i><br>NR-31903<br>(VRE) | 2 | 4 | 2 | 16 | 1 | 4 | - | - | - | - | - | - | >64 | >64 | 32 | >64 |
| <i>E. faecium</i><br>NR-31915<br>(VRE) | 4 | 4 | 1 | 1  | 1 | 8 | - | - | - | - | - | - | 4   | ND  | 2  | 64  |
| <i>E. faecium</i><br>E1071<br>(VRE)    | 4 | 4 | 4 | 16 | 4 | 4 | - | - | - | - | - | - | >64 | >64 | 2  | 32  |
| <i>E. faecium</i><br>NR-31916<br>(VRE) | 4 | 4 | 2 | 2  | 2 | 2 | - | - | - | - | - | - | >64 | >64 | 1  | 32  |

<sup>1</sup>ND = Not determined

**Table S3:** Fractional inhibitory concentration (FIC) index of phenylthiazole compounds **1-3** tested in combination with ciprofloxacin against enterococci via the checkerboard assay.

| <b>Test Combination</b>  | <b><i>E. faecalis</i><br/>ATCC 51299</b> | <b><i>E. faecalis</i><br/>ATCC 49532</b> | <b><i>E. faecalis</i><br/>ATCC 49533</b> |
|--------------------------|------------------------------------------|------------------------------------------|------------------------------------------|
| <b>1 + Ciprofloxacin</b> | 0.50                                     | 0.75                                     | 0.63                                     |
| <b>2 + Ciprofloxacin</b> | -                                        | 1.00                                     | 0.75                                     |
| <b>3 + Ciprofloxacin</b> | -                                        | 1.00                                     | 1.00                                     |



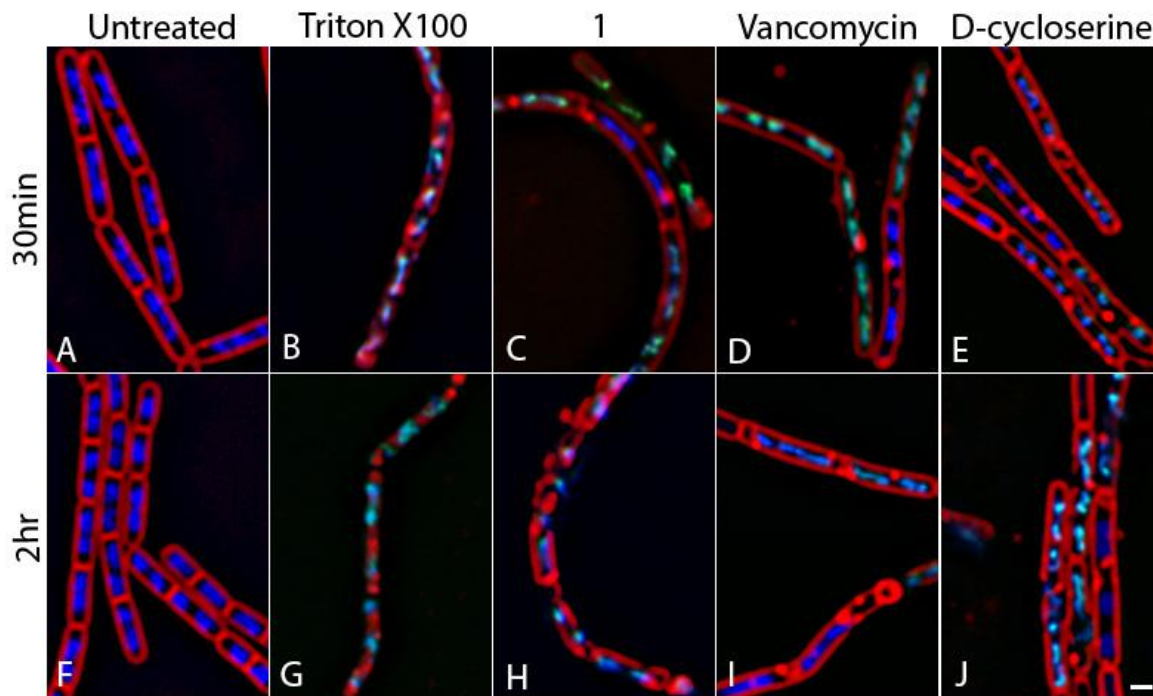

**Figure S1.** Profiles of membrane and cell wall active compounds in *B. subtilis* grown in LB at 37 °C. (A, F) Untreated *B. subtilis* cells show no lysis. (B, G) Cells treated with 0.1% Triton-X-100, a membrane active compound. (C, H) Cells treated with compound **1** at 5 × MIC (12.5 µg/mL). (D, I) Cells treated with Vancomycin at 5 × MIC (0.78 µg/mL). (E, J) Cells treated with D-cycloserine at 1 × MIC (37.5 µg/mL). Both cell wall inhibitors and membrane active compounds cause lysis, which is observed by the increase in staining by SYTOX. Cells were stained with FM 4-64 (red), DAPI (blue), and SYTOX Green (green).

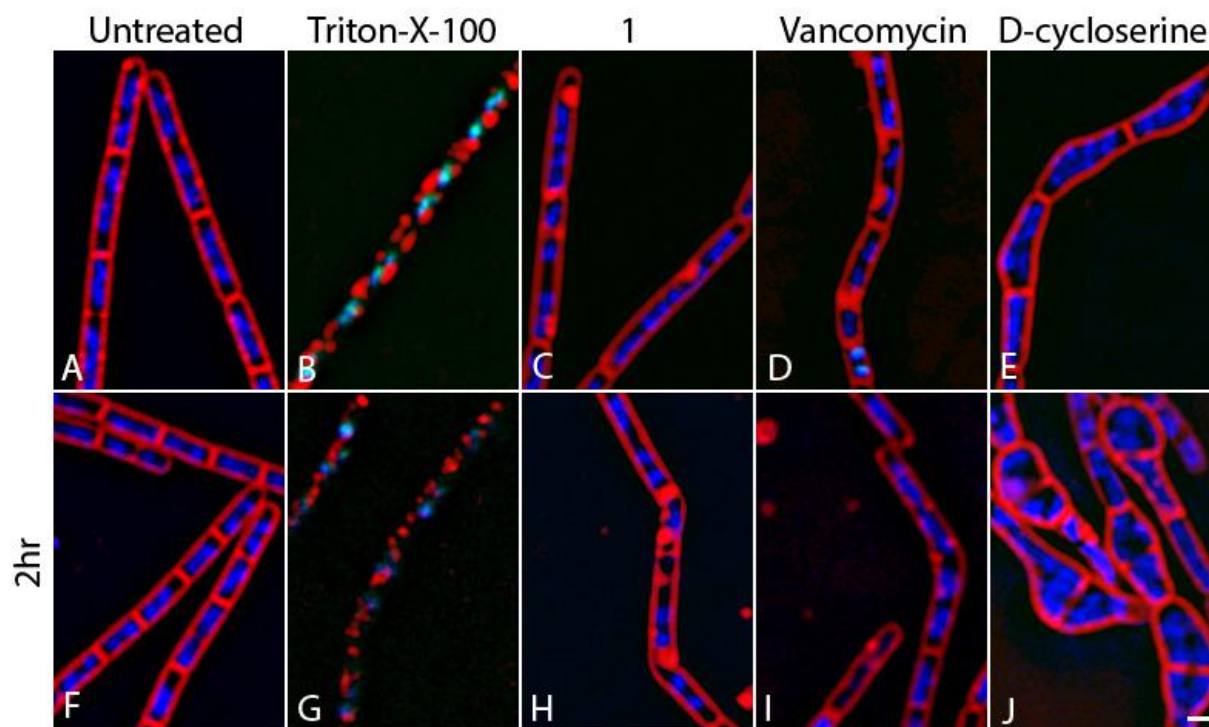

**Figure S2.** Profiles of membrane and cell wall active compounds in *B. subtilis* grown in LB in the presence of MSM at 37 °C. (A, F) Untreated cells show no cell shape defects or lysis. (B, G) Cells treated with 0.1% Triton-X-100. (C, H) Cells treated with compound **1** at 5 × MIC (12.5 µg/mL), show subtle cell shape defects consistent with cell wall inhibition. (D, I) Cells treated with vancomycin at 5 × MIC (0.78125 µg/mL). (E, J) Cells treated with D-cycloserine at 1 × MIC (37.5 µg/mL).

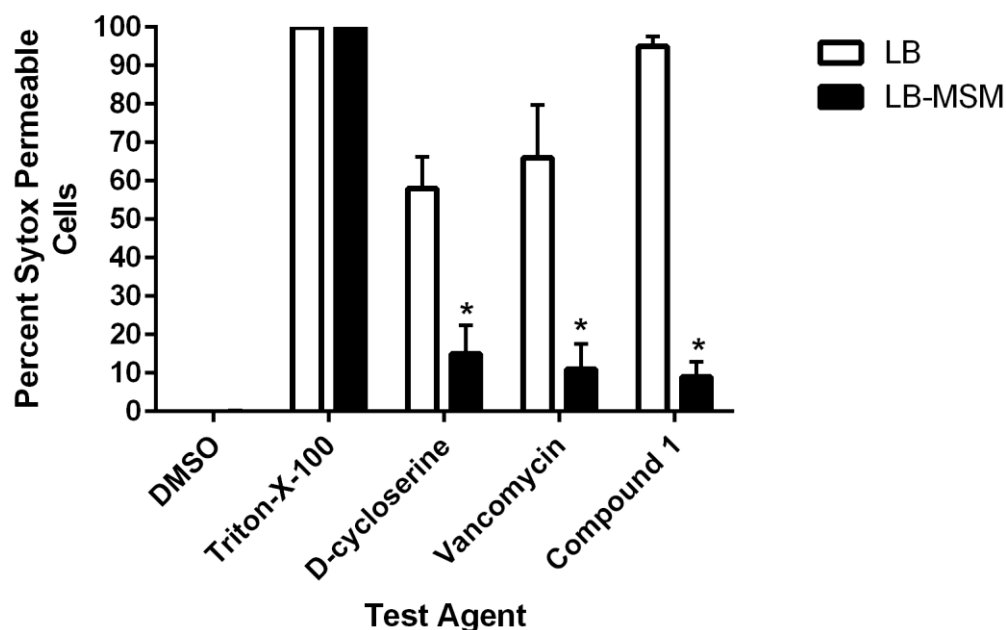

**Figure S3.** Percent Sytox permeable *B. subtilis* cells. Sytox permeable cells were counted at two hours. Untreated cells have no Sytox permeable cells in either LB or LBMSM, which osmotically stabilizes spheroplasts. Lysis caused by treatment with Triton X-100, a membrane active compound, is unaffected by LBMSM whereas lysis caused by cell wall inhibitors D-cycloserine and vancomycin, and by compound **1** is greatly reduced by growth in LBMSM. A two-way ANOVA with post-hoc Sidak's multiple comparisons test found statistical significance ( $P < 0.05$ ) between LB and LB-MSM groups for cells receiving treatment with D-cycloserine, vancomycin, and phenylthiazole compound **1**.

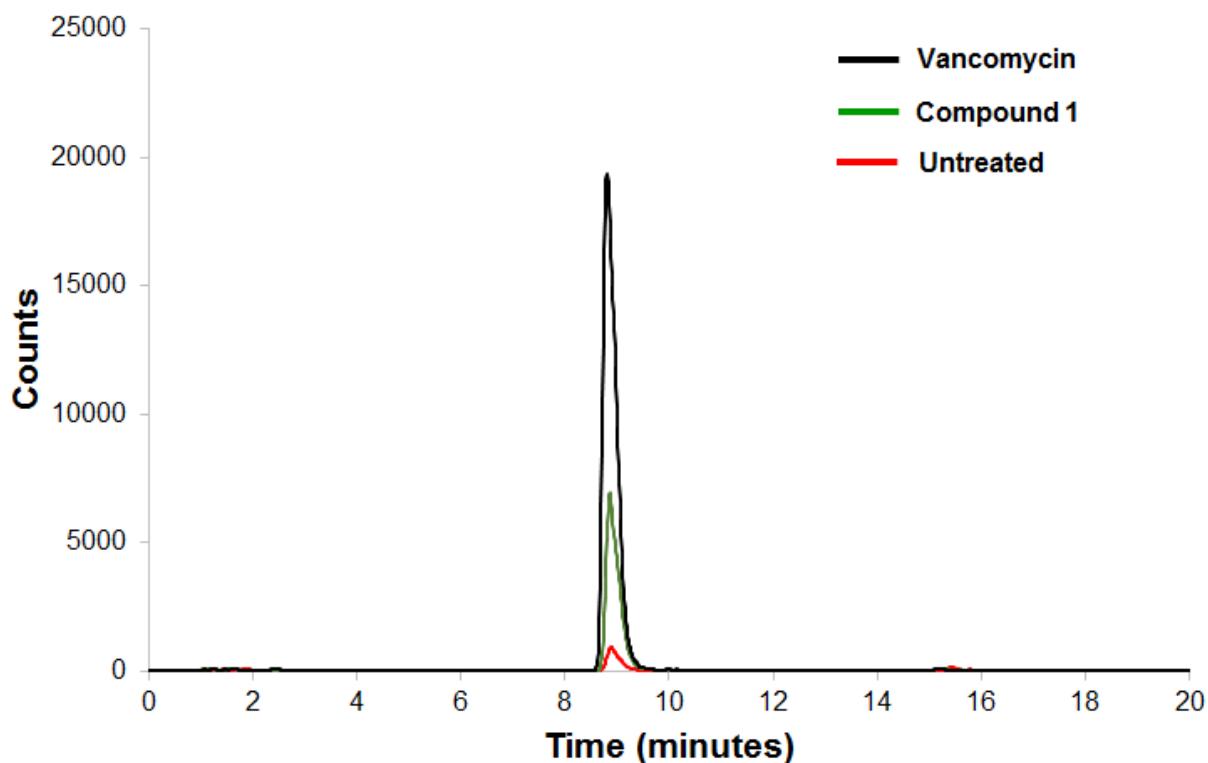

**Figure S4.** Detection of final soluble cell wall precursor (UDP-*N*-acetylmuramyl pentapeptide) inside bacterial cytoplasm. HPLC chromatogram of *E. faecalis* NR-31975 treated with  $10 \times$  MIC of compound **1** or vancomycin for 30 minutes. After centrifugation, the bacterial pellet was boiled for 30 minutes to release contents present in the bacterial cytoplasm. The lysate was analyzed using HPLC/MS to determine the accumulation of the final soluble precursor in cell wall synthesis, UDP-*N*-acetylmuramyl pentapeptide (designated by the black arrows).
